# Supplementary material for: Cellular senescence and disrupted proteostasis induced by myotube atrophy are prevented with low-dose metformin and leucine cocktail
Source: publisher site journal article supplement (doi:10.18632/aging.204600), 2023-03-20
Supplement: Supplementary file [file aging-v15i6-204600-supplementary-material-SD1.pdf]

**SUPPLEMENTARY FIGURES**

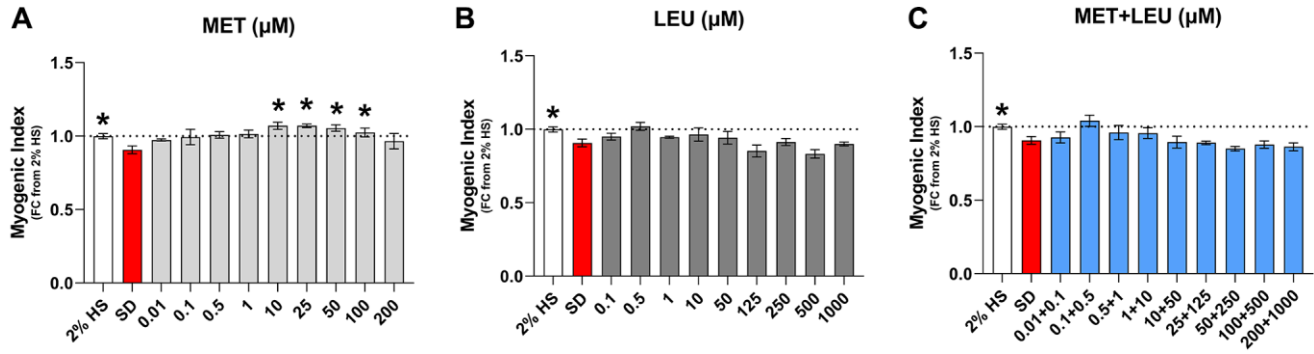

**Supplementary Figure 1. MET, but not LEU or MET+LEU alter myonuclei fusion during SD.** After 4-days of SD, myogenic index of differing doses of (A) MET, (B) LEU, and (C) MET+LEU. \**p* < 0.05 vs. SD, *N* = 3–16/group.

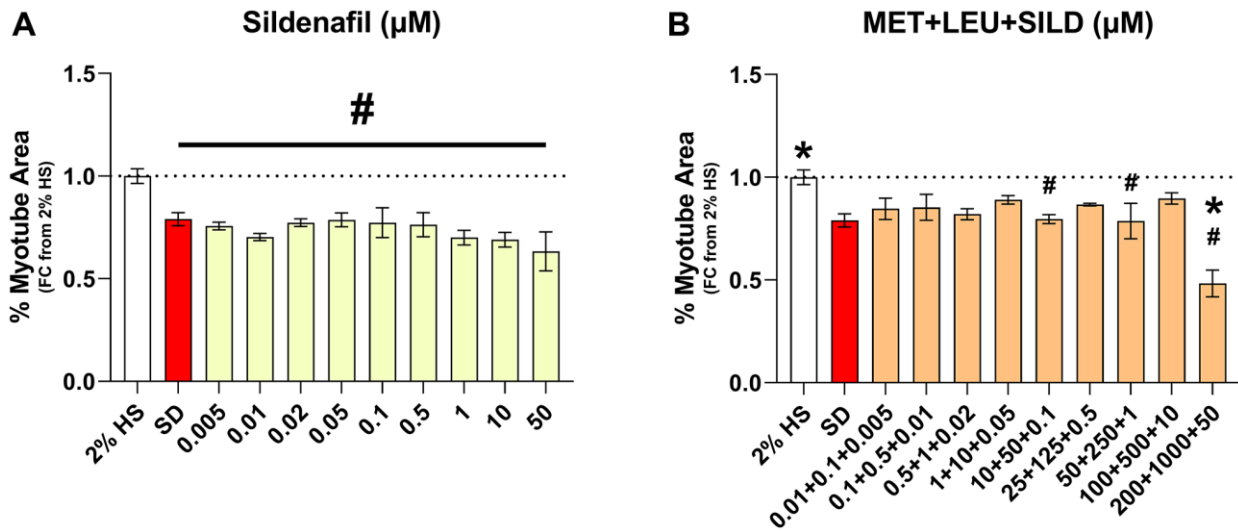

**Supplementary Figure 2. Sildenafil or MET+LEU+SILD combination does not prevent myotube atrophy during SD.** After 4-days of SD, myotube area with differing doses of (A) sildenafil alone or (B) metformin + leucine + sildenafil (MET+LEU+SILD) triple combination. \**p* < 0.05 vs. SD, #*p* < 0.05 vs. 2% HS. *N* = 3/group.

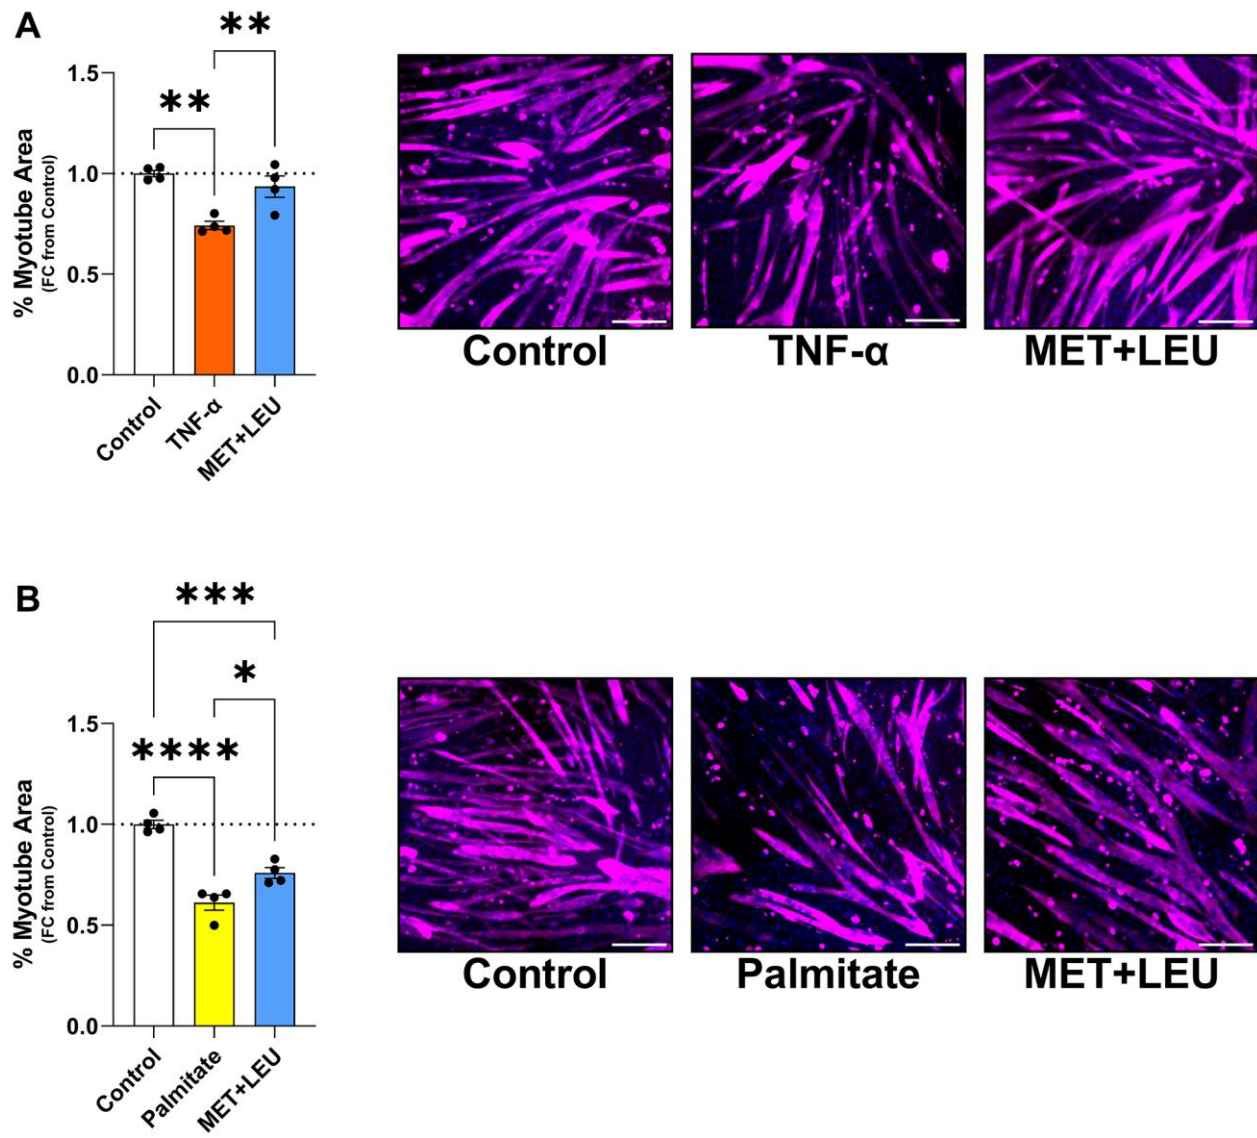

**Supplementary Figure 3. MET+LEU during inflammatory- and fatty acid-induced atrophy.** After 3 days of 100 ng/mL TNF- $\alpha$  with or without MET+LEU (A). After 1 day of 0.75 mM palmitate with or without MET+LEU (B).  $N = 4$ /group.

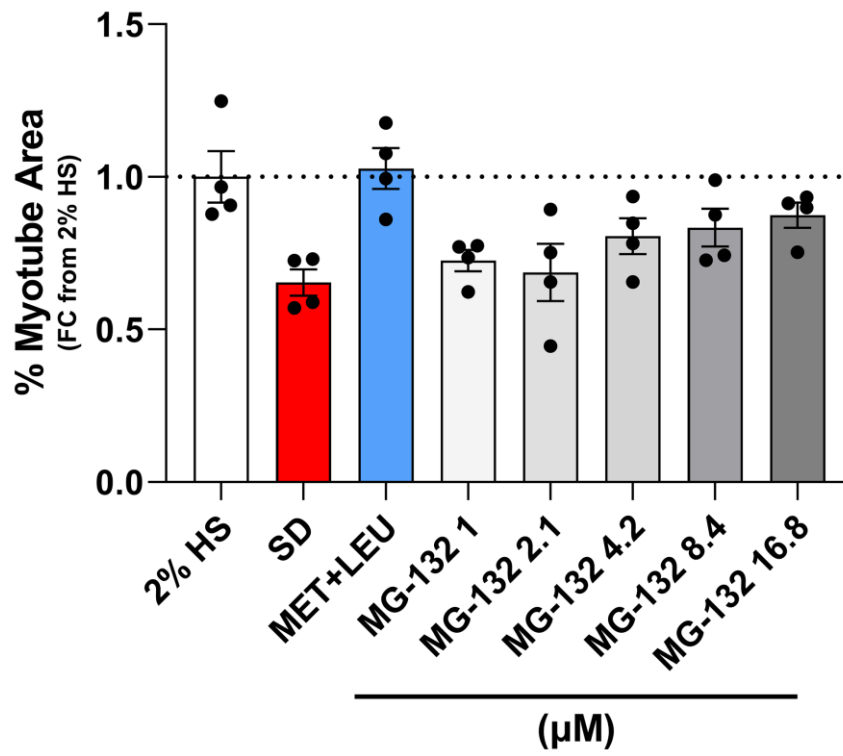

**Supplementary Figure 4. Proteasome inhibition prevents myotube atrophy during SD in a dose dependent manner.** After 4-days of SD, myotube area with 0.1 + 0.5  $\mu$ M MET+LEU, or doses of 1, 2.1, 4.2, 8.4, and 16.8  $\mu$ M MG-132 (proteasome inhibitor). *N* = 4/group.

## AMPK $\alpha$ Signaling

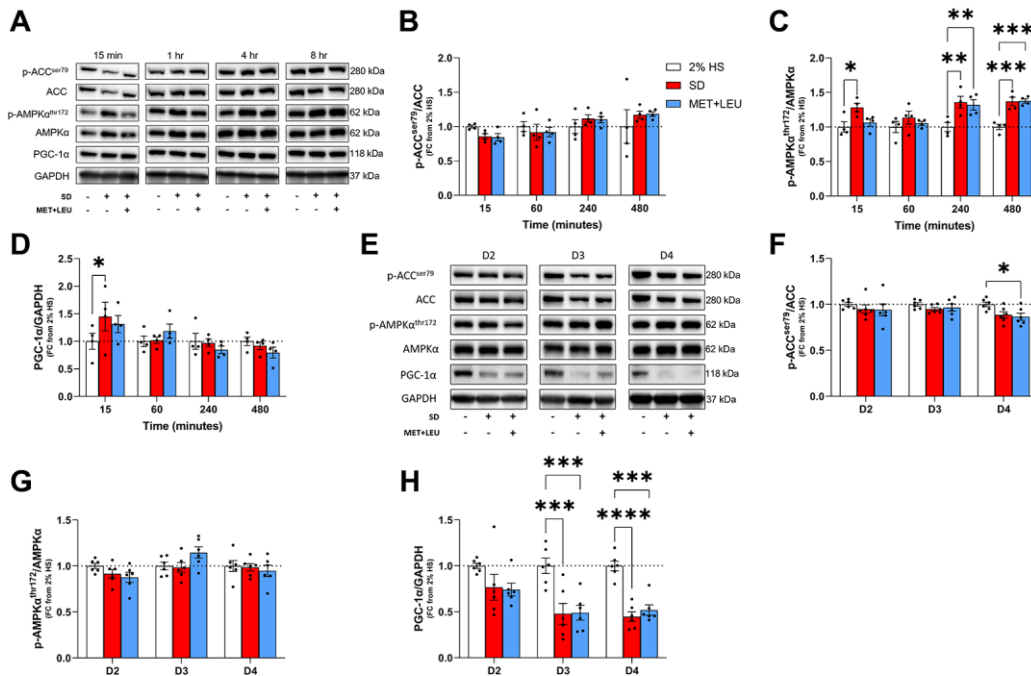

## mTORC1 Signaling

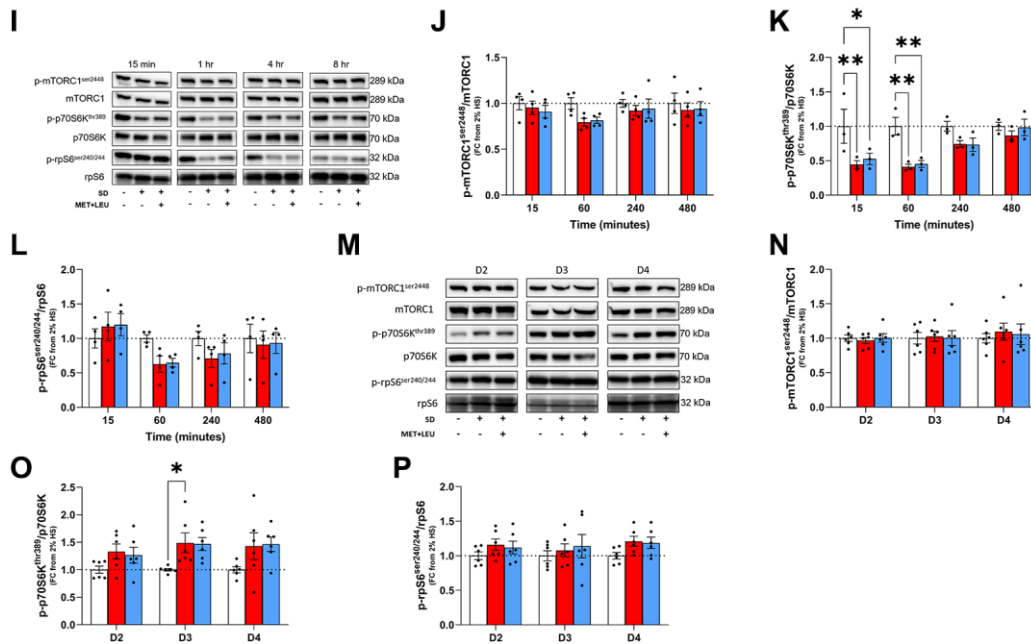

**Supplementary Figure 5. Acute and chronic AMPK $\alpha$  and mTORC1 signaling during SD.** (A) Representative western blots of acute (15 min to 8 hr) AMPK $\alpha$  signaling. (B–D) Western blot quantification of acute AMPK $\alpha$  related signaling events. (E) Representative western blots of chronic (2–4 days) AMPK $\alpha$  signaling. (F–H) Western blot quantification of chronic AMPK $\alpha$  related signaling events. (I) Representative western blots of acute mTORC1 signaling. (J–L) Western blot quantification of acute mTORC1 related signaling events. (M) Representative western blots of chronic mTORC1 signaling. (N–P) Western blot quantification of chronic mTORC1 related signaling events. \*\*\*\* $p < 0.0001$ , \*\*\* $p < 0.001$ , \*\* $p < 0.01$ , \* $p < 0.05$ .  $N = 4\text{--}6/\text{group}$ . Abbreviations: ACC: Acetyl-CoA carboxylase; AMPK $\alpha$ : 5' AMP-activated protein kinase alpha; PGC-1 $\alpha$ : PPARG coactivator 1alpha; GAPDH: Glyceraldehyde 3-phosphate dehydrogenase; mTORC1: Mechanistic target of rapamycin complex 1; p70S6K: Ribosomal protein S6 kinase; rpS6: Ribosomal protein S6.

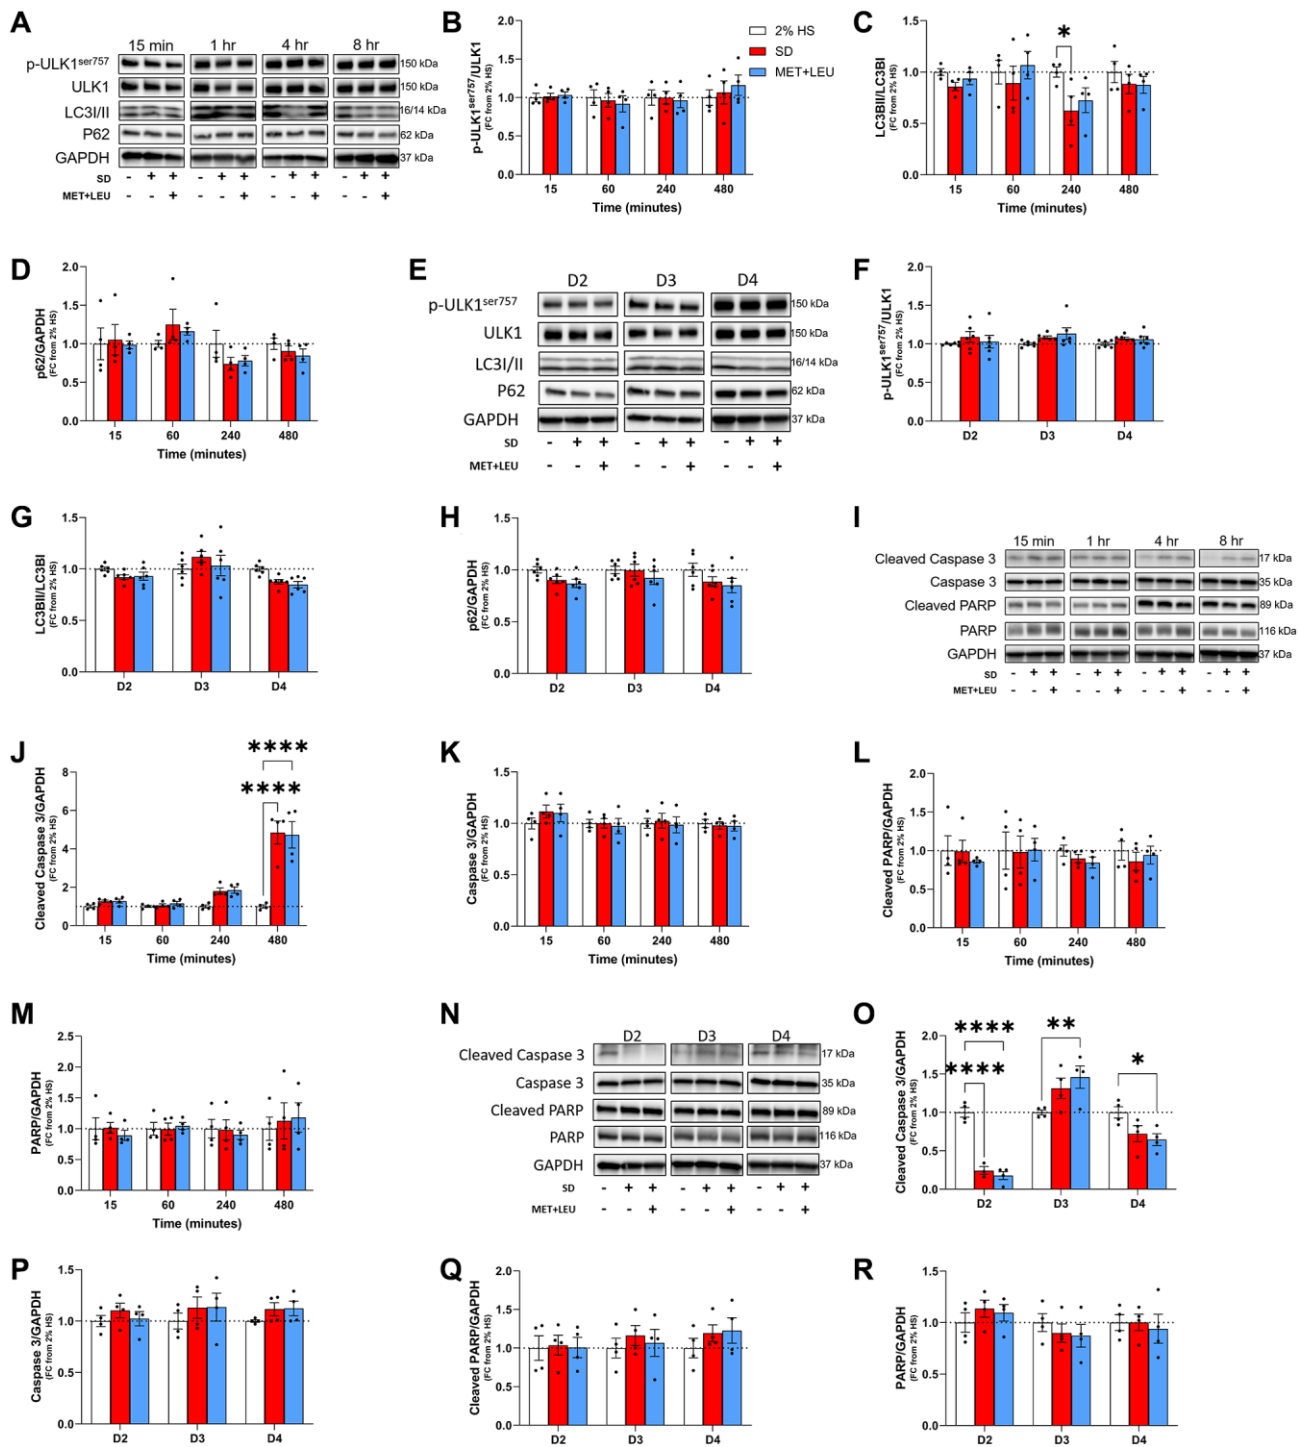

**Supplementary Figure 6. Acute and chronic autophagy and apoptosis markers during SD.** (A) Representative western blots of autophagy markers following 15 min to 8 hr of SD and treatments. (B–D) Western blot quantification of autophagy markers at acute treatment timepoints. (E) Representative western blots of autophagy markers following 2 to 4 days of SD and treatments. (F–H) Western blot quantification of autophagy markers following 2 to 4 days of SD and treatments. (I) Representative western blots of apoptosis markers following 15 min to 8 hr of SD and treatments. (J–M) Western blot quantification of apoptosis markers at acute treatment timepoints. (N) Representative western blots of apoptosis markers following 2 to 4 days of SD and treatments. (O–R) Western blot quantification of apoptosis markers at chronic treatment timepoints. \*\*\*\* $p < 0.0001$ , \*\* $p < 0.01$ , \* $p < 0.05$ .  $N = 4–6$ /group. Abbreviations: ULK1: Unc-like autophagy activating kinase 1; LC3/II: Microtubule-associated protein light chain 3–1/2; P62: Sequestosome 1; GAPDH: Glyceraldehyde 3-phosphate dehydrogenase; PARP: Poly (ADP-ribose) polymerase.

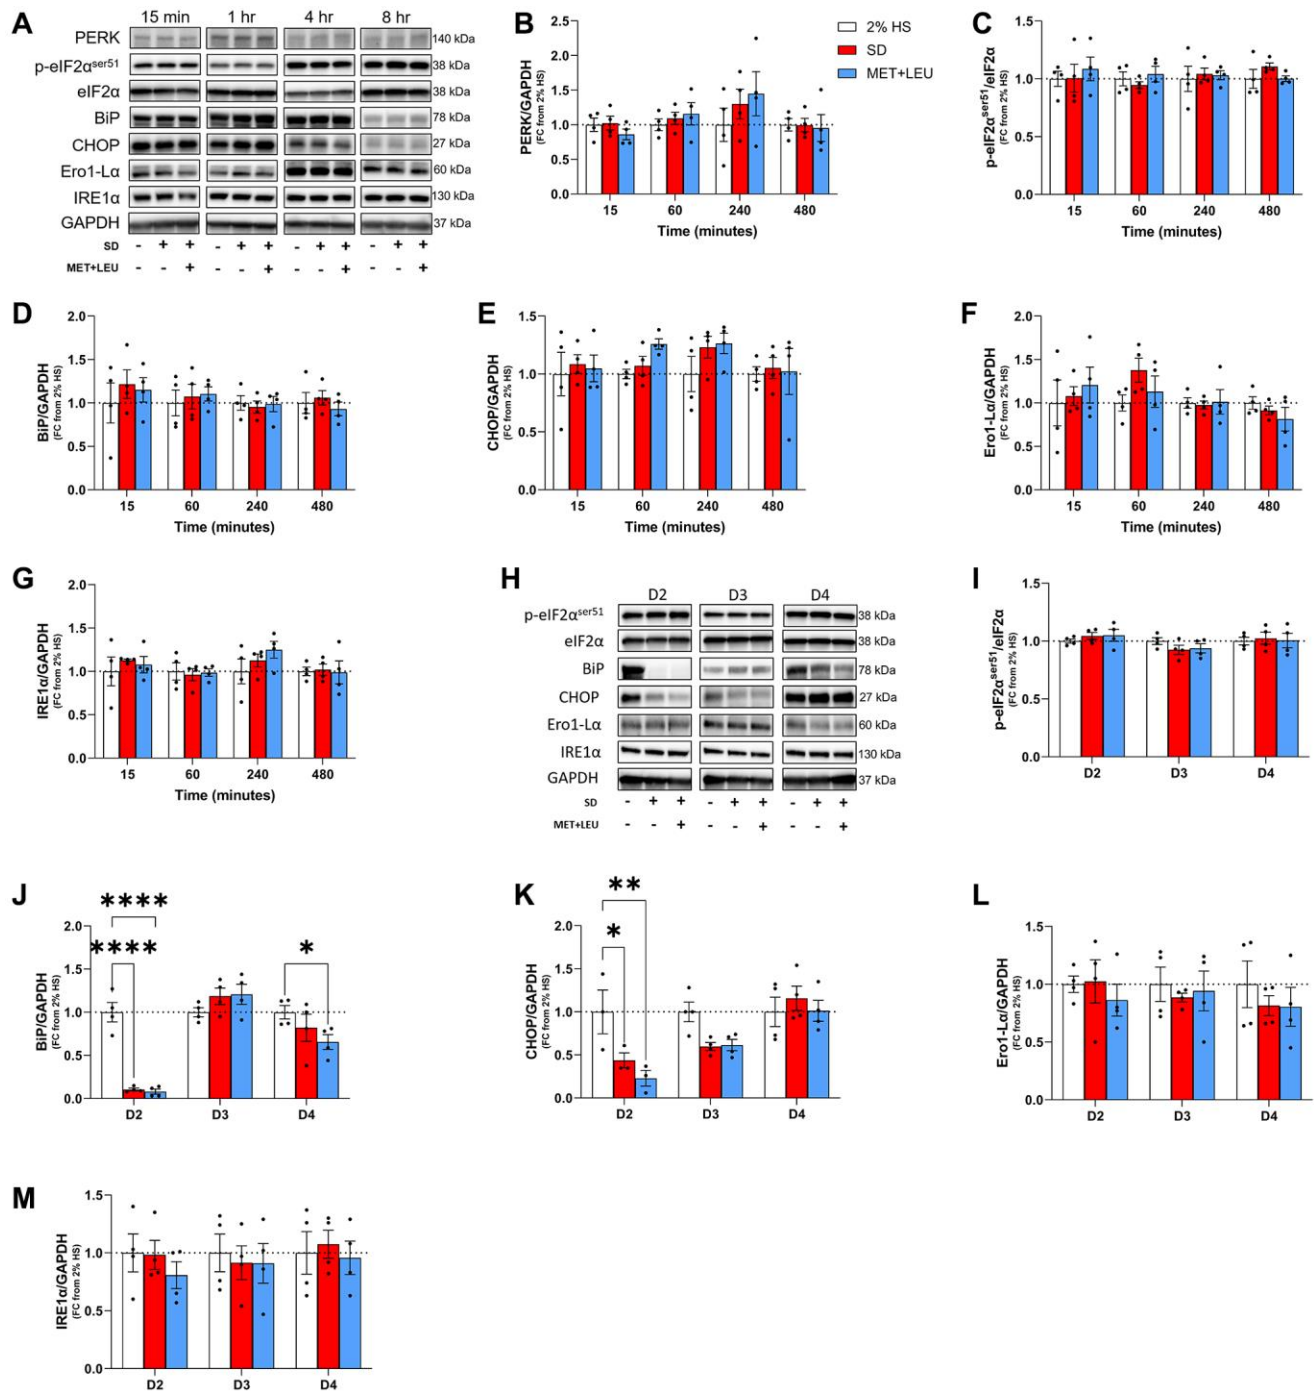

**Supplementary Figure 7. ER stress markers during SD.** (A) Representative western blots of ER stress markers following 15 min to 8 hr of SD. (B–G) Western blot quantification of ER stress markers at acute treatment timepoints. (H) Representative western blots of ER stress markers following 2 to 4 days of SD and treatments. (I–M) Western blot quantification of ER stress markers at chronic treatment timepoints. \*\*\*\* $p < 0.0001$ , \*\* $p < 0.01$ , \* $p < 0.05$ .  $N = 4/\text{group}$ . Abbreviations: PERK: Protein kinase RNA-like ER kinase; eIF2 $\alpha$ : Eukaryotic translation initiation factor 2 alpha; BiP: Binding immunoglobulin protein; CHOP: C/EBP homologous protein; Ero1-L $\alpha$ : Endoplasmic reticulum oxidoreductase 1 alpha; IRE1 $\alpha$ : Inositol-requiring enzyme 1 alpha; GAPDH; Glyceraldehyde 3-phosphate dehydrogenase.

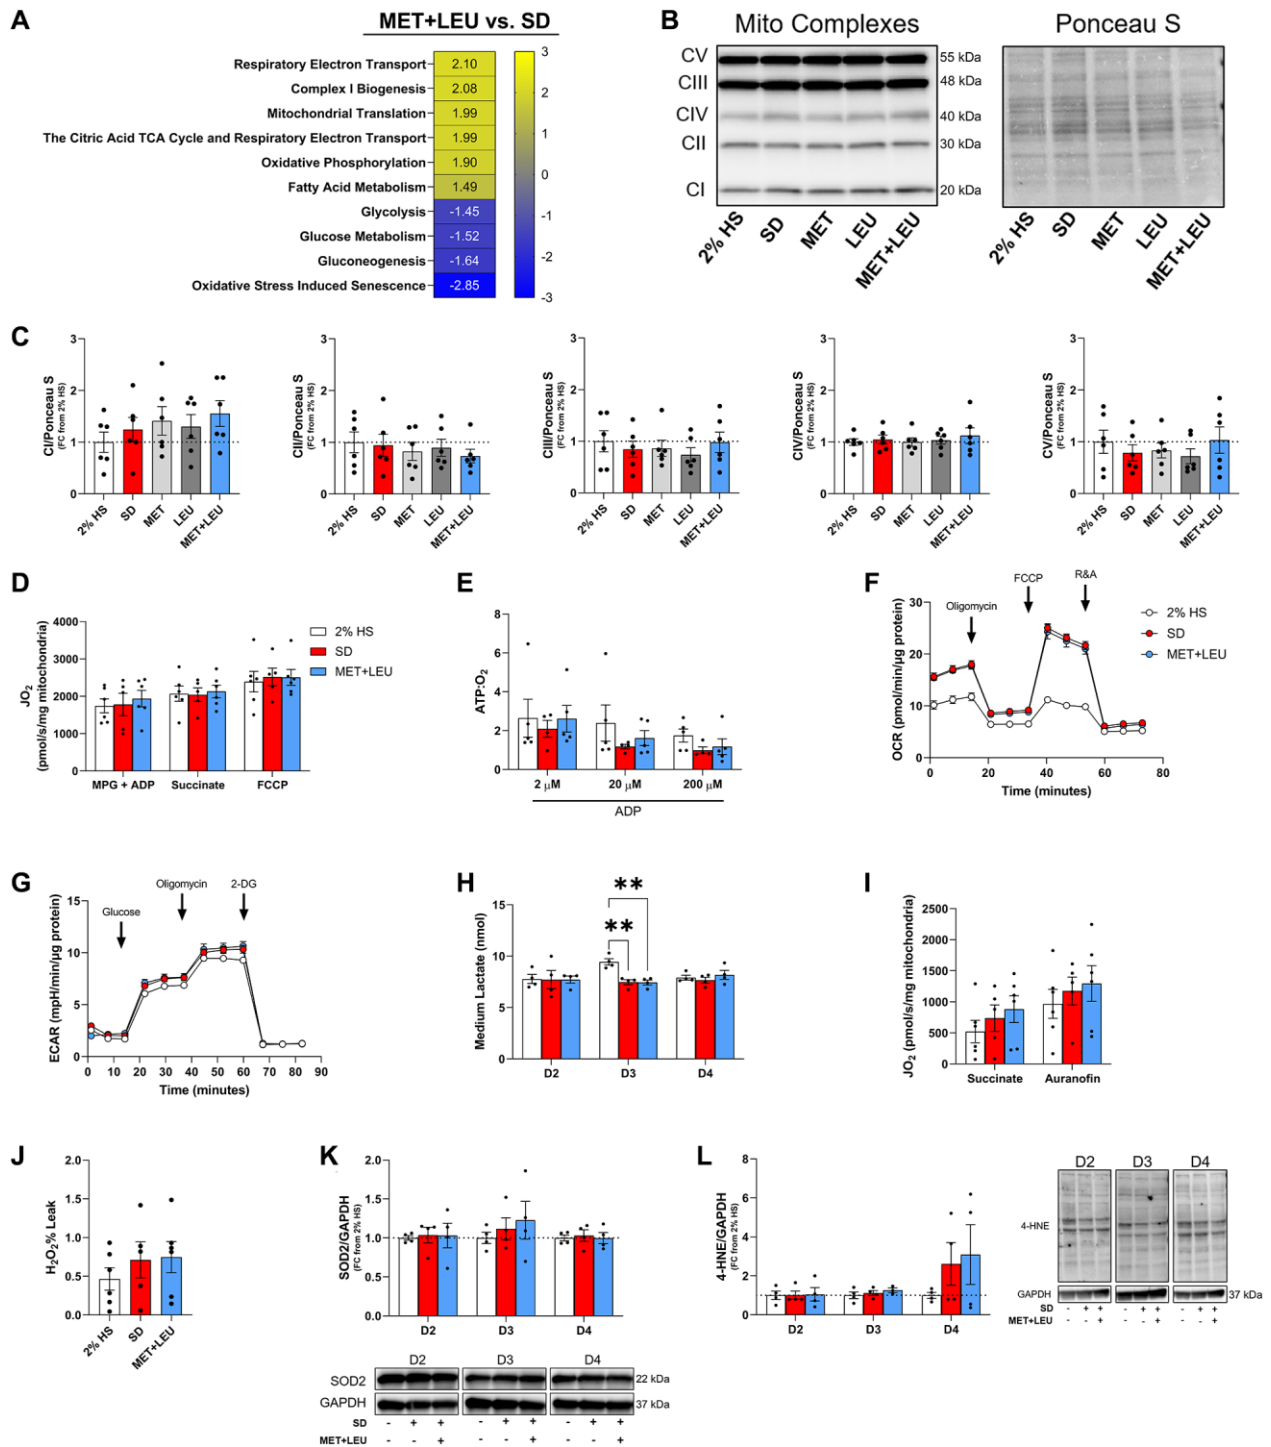

**Supplementary Figure 8. MET+LEU improved transcriptional pathways compared to SD without functional changes in metabolism.** (A) After 4-days of SD, transcriptional pathways related to mitochondrial content and function in MET+LEU vs. SD represented as NES. (B) Representative western blots of mitochondrial complex proteins. (C) Western blot quantification of mitochondrial complex proteins. (D) In isolated mitochondria, mitochondrial respiration with substrates malate, pyruvate, glutamate (MPG) + adenosine diphosphate (ADP), succinate, then carbonyl cyanide p-trifluoro-methoxyphenyl (FCCP). (E) In isolated mitochondria, mitochondrial efficiency measured by the ratio of ATP production: oxygen consumption. (F) Whole cell oxygen consumption rate (OCR). (G) Whole cell glycolytic function measured via extracellular acidification rate (ECAR). (H) Lactate in media from myotubes following 2, 3, or 4-days of SD. (I) ROS production (succinate) and emission (auranofin). (J) Hydrogen peroxide leak percentage. (K) Superoxide dismutase 2 (SOD2) western blot quantification and representative image. (L) Lipid peroxidation measured via 4-Hydroxynonenal (4-HNE), representative western blot image and quantification. \*\* $p < 0.01$ ,  $N = 4-6$ /group.

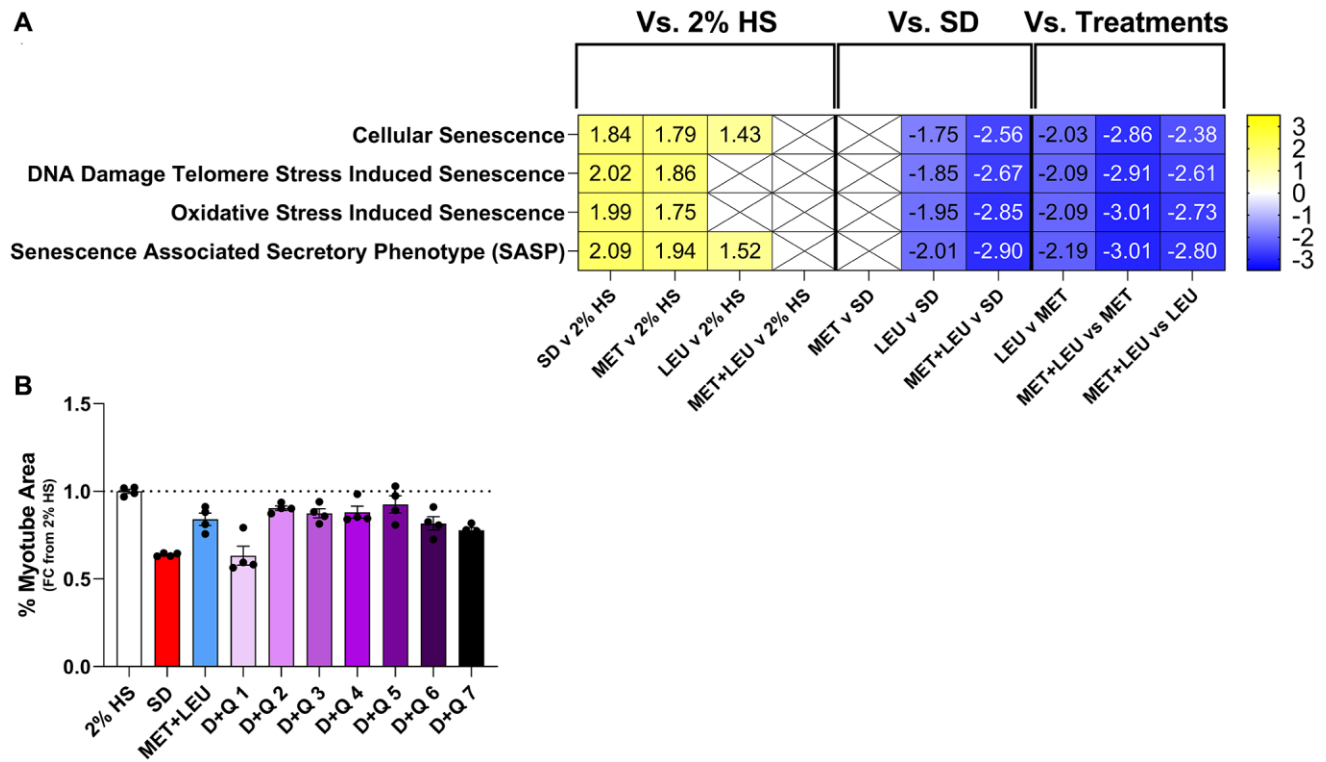

**Supplementary Figure 9. MET+LEU effect on cellular senescence pathways is likely driven by LEU synergy with MET. (A)** Pathways altered in all groups vs. 2% HS, SD, and the treatments compared to each other, related to cellular senescence; numbers are representative of NES. **(B)** Dose-response experiment of dasatinib + quercetin (D+Q); doses are the following: (1) 125 nM D + 25  $\mu$ M Q, (2) 62.5 nM D + 12.5  $\mu$ M Q, (3) 31.25 nM D + 6.25  $\mu$ M Q, (4) 15.63 nM D + 3.13  $\mu$ M Q, (5) 7.81 nM D + 1.56  $\mu$ M Q, (6) 3.91 nM D + 781.25 nM Q, (7) 1.95 nM D + 390.63 nM Q. *N* = 6/group for (A), *N* = 4/group for (B).



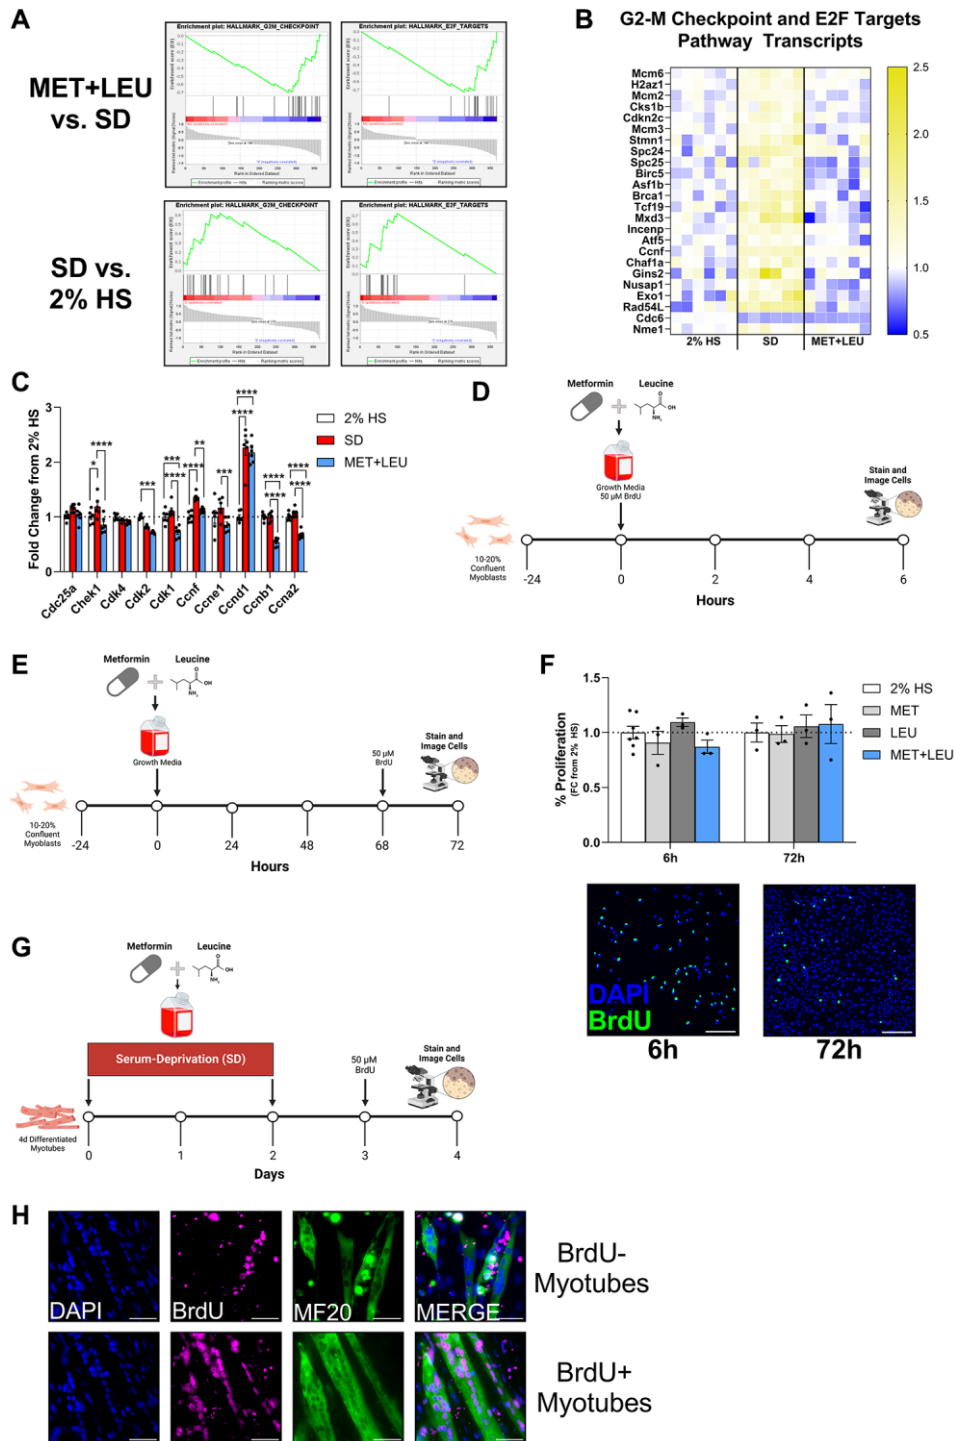

**Supplementary Figure 10. Cell cycle pathways, myoblast and myotube nuclei proliferation during SD.** (A) After 4-days SD in the 378 MET+LEU reversed genes, G2M checkpoint and E2F target gene set enrichment analysis (GSEA) pathways with MET+LEU vs. SD and SD vs. 2% HS. (B) Heatmap of G2M checkpoint and E2F target gene changes as fold change from 2% HS. (C) Cell cycle related transcripts from RNA-sequencing dataset. (D) Experimental schematic of 6-hour treatment with BrdU labeling on myoblast proliferation. (E) Experimental schematic of 72-hour treatment with 4-hour BrdU labeling on myoblast proliferation. (F) Percent myoblast proliferation after 6 or 72-hour treatments, with representative images, scale bar = 200  $\mu$ m. (G) Experimental schematic used to determine BrdU incorporation into myotubes following 4-days SD. (H) Representative image of BrdU incorporation into myotubes.  $N = 3-6$ /group.
